# Supplementary material for: Self-healing zwitterionic sulfobetaine nanocomposite hydrogels with good mechanical properties
Source: Royal Society of Chemistry journal article supplement (doi:10.1039/c9ra06728k), 2019-01-01
Supplement: c9ra06728k1.pdf [file c9ra06728k1.pdf]

## Supporting Information

### **Self-healing zwitterionic sulfobetaine nanocomposite hydrogels with good mechanical properties**

Yinlei Lin,<sup>\*a,b</sup> Zheng Zeng,<sup>b</sup> Yuhao Li,<sup>a</sup> Sheng Sun,<sup>a</sup> Xiaoting Liu,<sup>a</sup> Deliu He<sup>b</sup> and Guangji Li<sup>\*b</sup>

<sup>a</sup> School of Materials Science and Energy Engineering, Foshan University, Foshan, Guangdong 528000, China.

<sup>b</sup> School of Materials Science and Engineering, South China University of Technology, Guangzhou, Guangdong 510640, China.

\*Corresponding authors: Yinlei Lin, Guangji Li

E-mail addresses: linyinlei@fosu.edu.cn (Y. Lin), gjli@scut.edu.cn (G. Li)

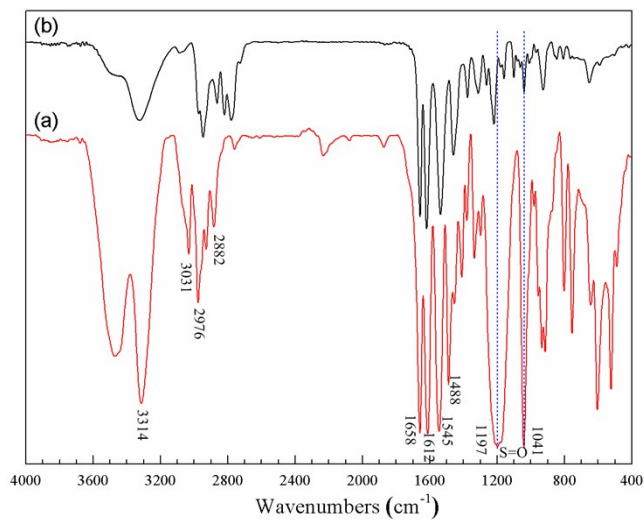

**Figure S1** FTIR spectra of sulfobetaine zwitterionic monomer DMAPMAPS (a) and DMAPMA (b).

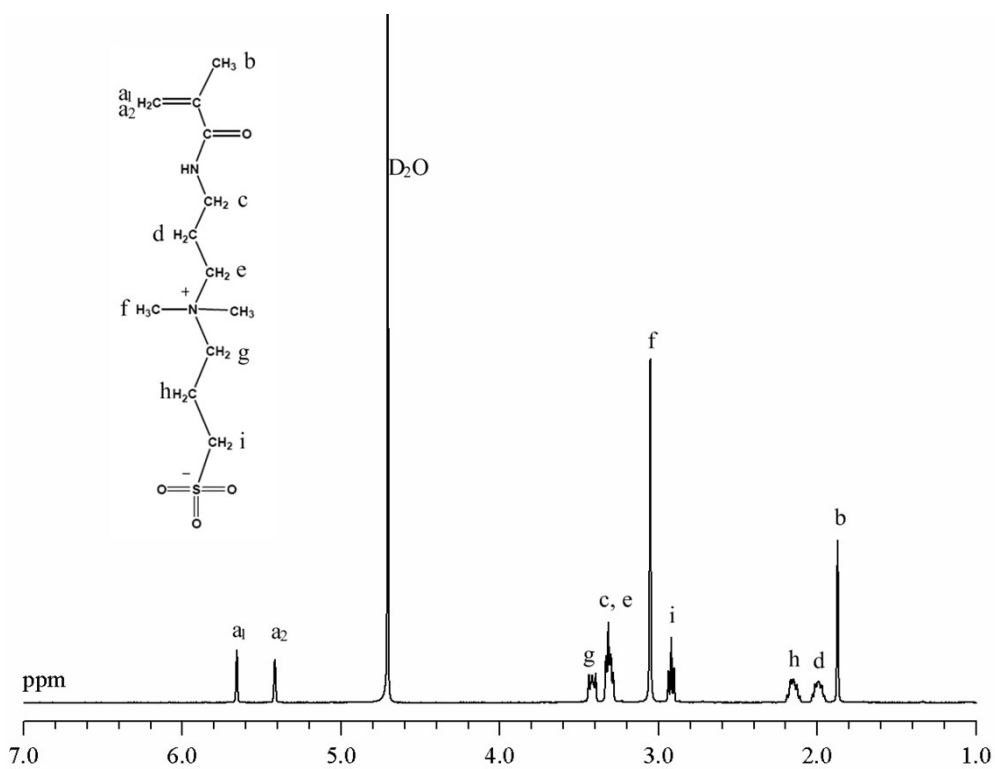

**Figure S2**  $^1\text{H}$  NMR spectrum of zwitterionic sulfobetaine monomer DMAPMAPS.

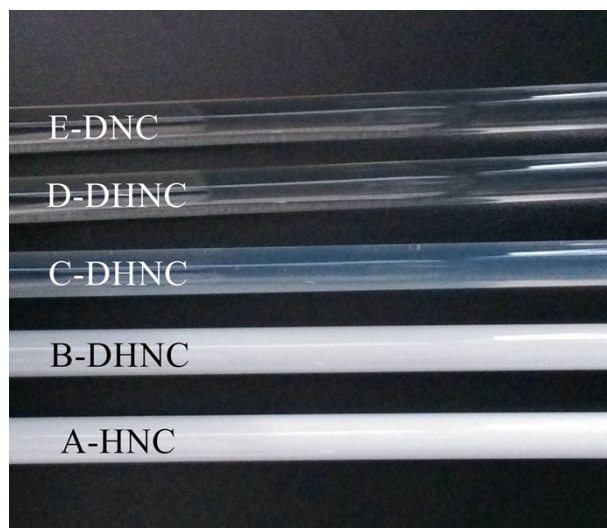

**Figure S3** Appearance of the nanocomposite hydrogels with different the weight ratio of DMAPMAPS/HEMA.

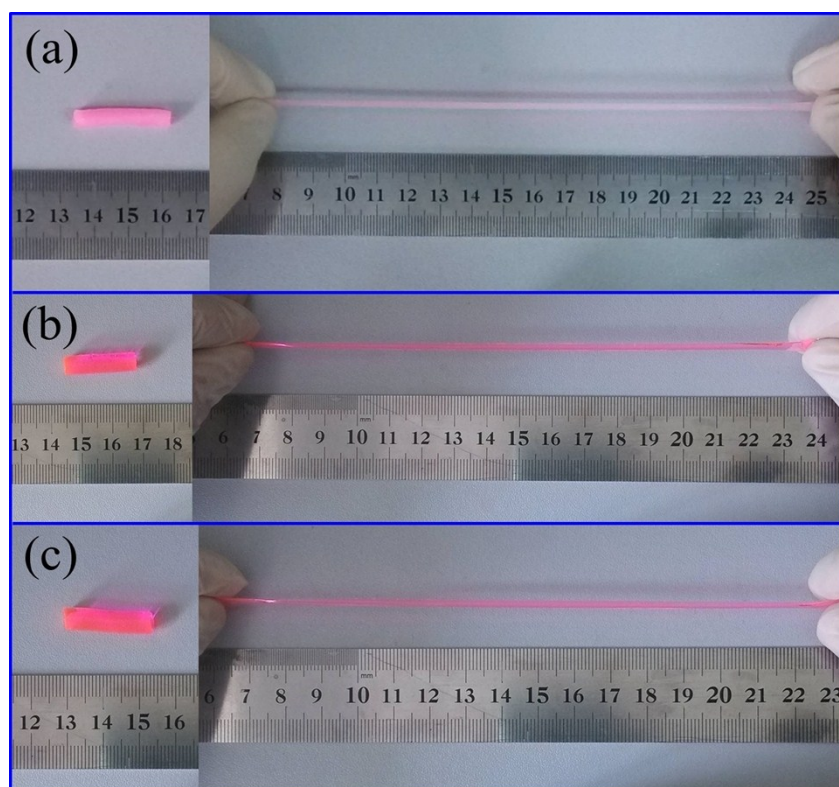

**Figure S4** Photographs before and after stretching of the nanocomposite hydrogels. B-DHNC(a), C-DHNC(b) and D-DHNC(c).

**Table S1** The mechanical properties of the nanocomposite hydrogels before cutting and after self-healing.

| Sample  | Tensile strength (kPa)<br>(before cutting) | Tensile strength (kPa)<br>(after self-healing) | Elongation at break (%)<br>(before cutting) |
|---------|--------------------------------------------|------------------------------------------------|---------------------------------------------|
| B-DHNC3 | 148                                        | 140                                            | 1018                                        |
| B-DHNC5 | 160                                        | 142                                            | 741                                         |
| B-DHNC7 | 168                                        | 146                                            | 659                                         |
| C-DHNC3 | 94                                         | 87                                             | 2114                                        |
| C-DHNC5 | 145                                        | 137                                            | 1992                                        |
| C-DHNC7 | 151                                        | 134                                            | 1379                                        |
| D-DHNC3 | 67                                         | 56                                             | 2270                                        |
| D-DHNC5 | 114                                        | 106                                            | 2322                                        |
| D-DHNC7 | 119                                        | 98                                             | 1603                                        |
